# Supplementary material for: Association between the Right Ventricular Longitudinal Shortening Fraction and Mortality in Acute Respiratory Distress Syndrome Related to COVID-19 Infection: A Prospective Study
Source: MDPI journal article supplement (doi:10.3390/jcm11092625), 2022-05-06
Supplement: s1 [file s1]

Supplementary Files

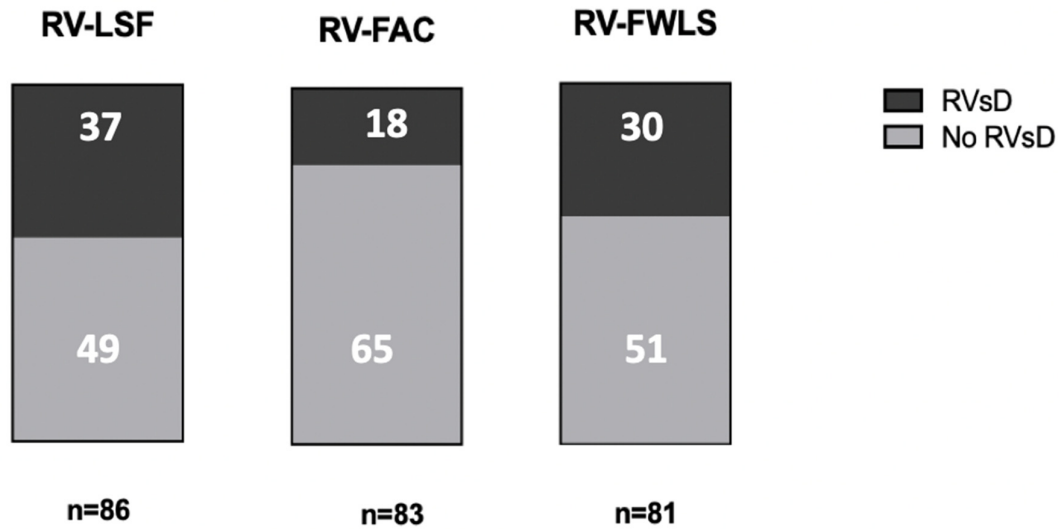

Figure S1. Legend: number of patients with RVsD according to the echocardiographic definition.

**RVsD:** right ventricular systolic dysfunction. **RV-LSF:** right ventricular longitudinal shortening fraction; **RV-FWLS:** right ventricular free wall longitudinal strain; **RV-GLS:** right ventricular global longitudinal strain.
